# Supplementary material for: Assessing the impact of community-based interventions on hypertension and diabetes management in three Minnesota communities: Findings from the prospective evaluation of US HealthRise programs
Source: PubMed Central journal article supplement (PMC9970068; doi:10.1371/journal.pone.0279230), 2023-02-27
Supplement: pone.0279230.s001.pdf [file pone.0279230.s001.pdf]

**S1 Table. Descriptive statistics for HealthRise patients, by site, across all patients (A) and by prevalent case of hypertension, diabetes, or both conditions (B).** Percentages are reported in terms of patients meeting inclusion criteria for (A) and patients with each condition for (B). All counts and percentages are directly calculated from de-identified patient data.

A)

| HealthRise patient information                                             | Hennepin County |               | Ramsey County |               | Rice County    |                |
|----------------------------------------------------------------------------|-----------------|---------------|---------------|---------------|----------------|----------------|
|                                                                            | Baseline (%)    | Endline (%)   | Baseline (%)  | Endline (%)   | Baseline (%)   | Endline (%)    |
| <b>Patients meeting inclusion criteria</b>                                 | <b>114</b>      | <b>95</b>     | <b>77</b>     | <b>52</b>     | <b>157</b>     | <b>152</b>     |
| Patients with hypertension (diagnosed, or $\geq 140$ SBP or $\geq 90$ DSP) | 102<br>(89.5%)  | 86<br>(90.5%) | 49<br>(63.6%) | 36<br>(69.2%) | 86<br>(54.8%)  | 88<br>(57.9%)  |
| Patients with diabetes (diagnosed, or $\geq 6.5\%$ A1c)                    | 94<br>(82.5%)   | 77<br>(81.1%) | 72<br>(93.5%) | 48<br>(92.3%) | 128<br>(82.5%) | 125<br>(82.2%) |
| Patients with hypertension and diabetes (diagnosed, or per readings)       | 82<br>(71.9%)   | 68<br>(71.6%) | 44<br>(57.1%) | 32<br>(61.5%) | 57<br>(29.9%)  | 61<br>(40.1%)  |
| <b>Demographic information (per enrollment data)</b>                       |                 |               |               |               |                |                |
| <b>Age</b>                                                                 |                 |               |               |               |                |                |
| < 50 years                                                                 | 41<br>(36.0%)   | 36<br>(37.9%) | 17<br>(22.1%) | 12<br>(23.1%) | 69<br>(43.9%)  | 67<br>(44.1%)  |
| $\geq 50$ years                                                            | 73<br>(64.0%)   | 59<br>(62.1%) | 60<br>(77.9%) | 40<br>(76.9%) | 88<br>(56.1%)  | 85<br>(55.9%)  |
| <b>Reported sex</b>                                                        |                 |               |               |               |                |                |
| Female                                                                     | 62<br>(54.4%)   | 55<br>(57.9%) | 42<br>(54.5%) | 27<br>(51.9%) | 84<br>(53.5%)  | 81<br>(53.3%)  |
| Male                                                                       | 52<br>(45.6%)   | 40<br>(42.1%) | 35<br>(45.5%) | 25<br>(48.1%) | 73<br>(46.5%)  | 71<br>(46.7%)  |
| <b>Reported race/ethnicity</b>                                             |                 |               |               |               |                |                |
| American Indian/Indigenous peoples                                         | -               | -             | 1<br>(1.3%)   | 1<br>(1.9%)   | -              | -              |
| Asian                                                                      | 4<br>(3.5%)     | 2<br>(2.1%)   | 1<br>(1.3%)   | 1<br>(1.9%)   | -              | -              |
| Black or African American                                                  | 68<br>(59.6%)   | 59<br>(62.1%) | 16<br>(20.8%) | 7<br>(13.7%)  | 16<br>(10.2%)  | 15<br>(9.9%)   |
| Hispanic or Latinx (all races)                                             | 2<br>(1.8%)     | 2<br>(2.1%)   | 41<br>(53.3%) | 33<br>(63.5%) | 134<br>(85.4%) | 130<br>(85.5%) |
| Multiracial                                                                | -               | -             | 1<br>(1.3%)   | 0<br>(0%)     | -              | -              |
| White                                                                      | 39<br>(34.2%)   | 32<br>(33.7%) | 17<br>(22.1%) | 10<br>(19.2%) | 7<br>(4.5%)    | 7<br>(4.6%)    |
| Not reported                                                               | 1<br>(0.9%)     | 0<br>(0%)     | -             | -             | -              | -              |

B)

| HealthRise patient clinical profiles, disaggregated by demographic information                                                                                      | Hennepin County |               | Ramsey County |               | Rice County    |                |
|---------------------------------------------------------------------------------------------------------------------------------------------------------------------|-----------------|---------------|---------------|---------------|----------------|----------------|
|                                                                                                                                                                     | Baseline (%)    | Endline (%)   | Baseline (%)  | Endline (%)   | Baseline (%)   | Endline (%)    |
| <b>Patients with hypertension (diagnosed, or <math>\geq 140</math> SBP or <math>\geq 90</math> DSP) - irrespective of diabetes diagnosis</b>                        | <b>102</b>      | <b>86</b>     | <b>49</b>     | <b>36</b>     | <b>86</b>      | <b>88</b>      |
| <b>Age</b>                                                                                                                                                          |                 |               |               |               |                |                |
| < 50 years                                                                                                                                                          | 35<br>(34.3%)   | 31<br>(36.0%) | 8<br>(16.3%)  | 7<br>(19.4%)  | 31<br>(36.0%)  | 31<br>(35.2%)  |
| $\geq 50$ years                                                                                                                                                     | 67<br>(65.7%)   | 55<br>(64.0%) | 41<br>(83.7%) | 29<br>(80.6%) | 55<br>(64.0%)  | 57<br>(64.8%)  |
| <b>Reported sex</b>                                                                                                                                                 |                 |               |               |               |                |                |
| Female                                                                                                                                                              | 57<br>(55.9%)   | 50<br>(58.1%) | 28<br>(55.6%) | 20<br>(51.2%) | 44<br>(51.2%)  | 45<br>(51.1%)  |
| Male                                                                                                                                                                | 45<br>(44.1%)   | 36<br>(41.9%) | 21<br>(42.9%) | 16<br>(44.4%) | 42<br>(48.8%)  | 43<br>(48.9%)  |
| <b>Reported race/ethnicity</b>                                                                                                                                      |                 |               |               |               |                |                |
| American Indian/Indigenous peoples                                                                                                                                  | -               | -             | 1<br>(2.0%)   | 1<br>(2.8%)   | -              | -              |
| Asian                                                                                                                                                               | 4<br>(3.9%)     | 2<br>(2.3%)   | 1<br>(2.0%)   | 1<br>(2.8%)   | -              | -              |
| Black or African American                                                                                                                                           | 61<br>(59.8%)   | 55<br>(64.0%) | 16<br>(32.7%) | 7<br>(19.4%)  | 14<br>(16.3%)  | 13<br>(14.8%)  |
| Hispanic or Latinx (all races)                                                                                                                                      | 2<br>(2.0%)     | 2<br>(2.3%)   | 18<br>(36.7%) | 19<br>(52.8%) | 66<br>(76.7%)  | 68<br>(77.3%)  |
| Multiracial                                                                                                                                                         | -               | -             | 1<br>(2.0%)   | 0<br>(0.0%)   | -              | -              |
| White                                                                                                                                                               | 34<br>(33.3%)   | 27<br>(31.4%) | 12<br>(24.5%) | 8<br>(22.2%)  | 6<br>(7.0%)    | 7<br>(8.0%)    |
| Not reported                                                                                                                                                        | 1<br>(1.0%)     | 0<br>(0.0%)   | -             | -             | -              | -              |
| <b>Patients with diabetes (diagnosed, or <math>\geq 6.5\%</math> A1c) - irrespective of hypertension diagnosis</b>                                                  | <b>94</b>       | <b>77</b>     | <b>72</b>     | <b>48</b>     | <b>128</b>     | <b>125</b>     |
| <b>Age</b>                                                                                                                                                          |                 |               |               |               |                |                |
| < 50 years                                                                                                                                                          | 32<br>(34.0%)   | 27<br>(35.1%) | 16<br>(22.2%) | 11<br>(22.9%) | 56<br>(43.8%)  | 55<br>(44.0%)  |
| $\geq 50$ years                                                                                                                                                     | 62<br>(66.0%)   | 50<br>(64.9%) | 56<br>(77.8%) | 37<br>(77.1%) | 72<br>(56.3%)  | 70<br>(56.0%)  |
| <b>Reported sex</b>                                                                                                                                                 |                 |               |               |               |                |                |
| Female                                                                                                                                                              | 47<br>(50.0%)   | 40<br>(51.9%) | 39<br>(54.2%) | 25<br>(52.1%) | 71<br>(55.5%)  | 69<br>(55.2%)  |
| Male                                                                                                                                                                | 47<br>(50.0%)   | 37<br>(48.1%) | 33<br>(45.8%) | 23<br>(47.9%) | 57<br>(44.5%)  | 56<br>(44.8%)  |
| <b>Reported race/ethnicity</b>                                                                                                                                      |                 |               |               |               |                |                |
| American Indian/Indigenous peoples                                                                                                                                  | -               | -             | 1<br>(1.4%)   | 1<br>(2.1%)   | -              | -              |
| Asian                                                                                                                                                               | 3<br>(3.2%)     | 2<br>(2.6%)   | 1<br>(1.4%)   | 1<br>(2.1%)   | -              | -              |
| Black or African American                                                                                                                                           | 55<br>(58.5%)   | 46<br>(59.7%) | 15<br>(20.8%) | 6<br>(12.5%)  | 6<br>(4.7%)    | 6<br>(4.8%)    |
| Hispanic or Latinx (all races)                                                                                                                                      | 2<br>(2.1%)     | 2<br>(2.6%)   | 40<br>(55.6%) | 33<br>(68.8%) | 117<br>(91.4%) | 114<br>(91.2%) |
| Multiracial                                                                                                                                                         | -               | -             | 1<br>(1.4%)   | 0<br>(0.0%)   | -              | -              |
| White                                                                                                                                                               | 33<br>(35.1%)   | 27<br>(35.1%) | 14<br>(19.4%) | 7<br>(14.6%)  | 5<br>(3.9%)    | 5<br>(4.0%)    |
| Not reported                                                                                                                                                        | 1<br>(1.1%)     | 0<br>(0.0%)   | -             | -             | -              | -              |
| <b>Patients with hypertension and diabetes (diagnosed, or per readings: <math>\geq 140</math> SBP or <math>\geq 90</math> DSP, and <math>\geq 6.5\%</math> A1c)</b> | <b>82</b>       | <b>68</b>     | <b>44</b>     | <b>32</b>     | <b>57</b>      | <b>61</b>      |
| <b>Age</b>                                                                                                                                                          |                 |               |               |               |                |                |
| < 50 years                                                                                                                                                          | 26<br>(31.7%)   | 22<br>(32.4%) | 7<br>(15.9%)  | 6<br>(18.8%)  | 18<br>(31.6%)  | 19<br>(31.1%)  |
| $\geq 50$ years                                                                                                                                                     | 56<br>(68.3%)   | 46<br>(67.6%) | 37<br>(84.1%) | 26<br>(81.3%) | 39<br>(68.4%)  | 42<br>(68.9%)  |
| <b>Reported sex</b>                                                                                                                                                 |                 |               |               |               |                |                |
| Female                                                                                                                                                              | 42<br>(51.2%)   | 35<br>(51.5%) | 25<br>(56.8%) | 18<br>(56.3%) | 31<br>(54.4%)  | 33<br>(54.1%)  |
| Male                                                                                                                                                                | 40<br>(48.8%)   | 33<br>(48.5%) | 19<br>(43.2%) | 14<br>(43.8%) | 26<br>(45.6%)  | 28<br>(45.9%)  |
| <b>Reported race/ethnicity</b>                                                                                                                                      |                 |               |               |               |                |                |
| American Indian/Indigenous peoples                                                                                                                                  | -               | -             | 1<br>(2.3%)   | 1<br>(3.1%)   | -              | -              |
| Asian                                                                                                                                                               | 3<br>(3.7%)     | 2<br>(2.9%)   | 1<br>(2.3%)   | 1<br>(3.1%)   | -              | -              |
| Black or African American                                                                                                                                           | 48<br>(58.5%)   | 42<br>(61.8%) | 15<br>(34.1%) | 6<br>(18.8%)  | 4<br>(7.0%)    | 4<br>(6.6%)    |
| Hispanic or Latinx (all races)                                                                                                                                      | 2<br>(2.4%)     | 2<br>(2.9%)   | 17<br>(38.6%) | 19<br>(59.4%) | 49<br>(86.0%)  | 52<br>(85.2%)  |
| Multiracial                                                                                                                                                         | -               | -             | 1<br>(2.3%)   | 0<br>(0.0%)   | -              | -              |
| White                                                                                                                                                               | 28<br>(34.1%)   | 22<br>(32.4%) | 9<br>(20.5%)  | 5<br>(15.6%)  | 4<br>(7.0%)    | 5<br>(8.2%)    |
| Not reported                                                                                                                                                        | 1<br>(1.2%)     | 0<br>(0.0%)   | -             | -             | -              | -              |
