# Supplementary material for: Assessing the impact of community-based interventions on hypertension and diabetes management in three Minnesota communities: Findings from the prospective evaluation of US HealthRise programs
Source: PubMed Central journal article supplement (PMC9970068; doi:10.1371/journal.pone.0279230), 2023-02-27
Supplement: pone.0279230.s002.pdf [file pone.0279230.s002.pdf]

**S3 Table. Sensitivity analyses adjusting for baseline measures of systolic blood pressure (SBP) and A1c for difference-in-difference regression results, by HealthRise site, for hypertension (A) and diabetes (B) patients.** Patient samples included in this analysis are those who met all inclusion criteria, remained enrolled throughout the program (for HealthRise patients), and had at least two biometric readings to reflect potential changes between baseline and endline. Bolded values reflect statistically significant estimates at  $p < 0.05$ .

**A) Hypertension**

|                                                             | <b>Hennepin County</b>     |                   | <b>Ramsey County</b>       |                   | <b>Rice County</b>          |                   |
|-------------------------------------------------------------|----------------------------|-------------------|----------------------------|-------------------|-----------------------------|-------------------|
|                                                             | Coefficient (95% CI)       | <i>p</i> -value   | Coefficient (95% CI)       | <i>p</i> -value   | Coefficient (95% CI)        | <i>p</i> -value   |
| <b>Change in systolic blood pressure (SBP, mmHg)</b>        |                            |                   |                            |                   |                             |                   |
| <b>Unadjusted model (original)</b>                          |                            |                   |                            |                   |                             |                   |
| HealthRise-endline interaction                              | -5.6 (-11.7 to 0.4)        | 0.068             | -10.7 (-21.7 to 0.2)       | 0.054             | <b>-6.9 (-12.9 to -0.9)</b> | <b>0.024</b>      |
| <b>Unadjusted model + adjusting for baseline SBP (mmHg)</b> |                            |                   |                            |                   |                             |                   |
| HealthRise-endline interaction                              | -5.6 (-11.7 to 0.4)        | 0.068             | -10.7 (-21.7 to 0.2)       | 0.055             | <b>-6.9 (-12.9 to -0.9)</b> | <b>0.024</b>      |
| Baseline SBP (mmHg)                                         | <b>0.6 (0.6 to 0.7)</b>    | <b>&lt; 0.001</b> | <b>0.7 (0.6 to 0.8)</b>    | <b>&lt; 0.001</b> | <b>0.7 (0.6 to 0.8)</b>     | <b>&lt; 0.001</b> |
| <b>Unadjusted model + adjusting for baseline SBP target</b> |                            |                   |                            |                   |                             |                   |
| HealthRise-endline interaction                              | -5.6 (-11.7 to 0.4)        | 0.068             | -10.7 (-21.7 to 0.2)       | 0.055             | <b>-6.9 (-12.9 to -0.9)</b> | <b>0.024</b>      |
| Baseline SBP meets clinical target                          |                            |                   |                            |                   |                             |                   |
| Yes (< 140 mmHg)                                            | -                          | -                 | -                          | -                 | -                           | -                 |
| No (≥ 140 mmHg)                                             | <b>15.8 (12.2 to 19.4)</b> | <b>&lt; 0.001</b> | <b>24.3 (18.2 to 30.3)</b> | <b>&lt; 0.001</b> | <b>20.8 (16.8 to 24.8)</b>  | <b>&lt; 0.001</b> |
| <b>Adjusted model (original)</b>                            |                            |                   |                            |                   |                             |                   |
| HealthRise-endline interaction                              | -5.6 (-11.7 to 0.5)        | 0.070             | -10.7 (-21.8 to 0.3)       | 0.057             | <b>-6.9 (-13.0 to -0.9)</b> | <b>0.025</b>      |
| Age                                                         |                            |                   |                            |                   |                             |                   |
| < 50 years                                                  | -                          | -                 | -                          | -                 | -                           | -                 |
| ≥ 50 years                                                  | 1.1 (-4.2 to 6.4)          | 0.677             | 3.6 (-2.8 to 10.1)         | 0.266             | 1.4 (-2.9 to 5.7)           | 0.531             |
| Sex                                                         |                            |                   |                            |                   |                             |                   |
| Male                                                        | -                          | -                 | -                          | -                 | -                           | -                 |
| Female                                                      | -0.3 (-4.6 to 4.1)         | 0.909             | 2.6 (-4.3 to 9.6)          | 0.455             | 0.5 (-3.2 to 4.2)           | 0.780             |
| Duration from baseline to endline                           |                            |                   |                            |                   |                             |                   |
| < 12 months                                                 | -                          | -                 | -                          | -                 | -                           | -                 |
| ≥ 12 months                                                 | -0.8 (-8.0 to 6.4)         | 0.829             | -2.0 (-11.3 to 7.2)        | 0.663             | <b>-9.1 (-14.1 to -4.2)</b> | <b>&lt; 0.001</b> |
| Comorbid                                                    |                            |                   |                            |                   |                             |                   |
| No (hypertension only)                                      | -                          | -                 | -                          | -                 | -                           | -                 |
| Yes (hypertension and diabetes)                             | -5.6 (-11.7 to 0.5)        | 0.266             | -7.4 (-15.1 to 0.3)        | 0.061             | <b>8.5 (2.5 to 14.5)</b>    | <b>0.006</b>      |
| <b>Adjusted model (+ adjusting for baseline SBP [mmHg])</b> |                            |                   |                            |                   |                             |                   |
| HealthRise-endline interaction                              | -5.6 (-11.7 to 0.5)        | 0.070             | -10.7 (-21.8 to 0.3)       | 0.058             | <b>-6.9 (-13.0 to -0.9)</b> | <b>0.025</b>      |
| Baseline SBP (mmHg)                                         | <b>0.6 (0.6 to 0.7)</b>    | <b>&lt; 0.001</b> | <b>0.7 (0.6 to 0.8)</b>    | <b>&lt; 0.001</b> | <b>0.7 (0.6 to 0.8)</b>     | <b>&lt; 0.001</b> |
| Age                                                         |                            |                   |                            |                   |                             |                   |
| < 50 years                                                  | -                          | -                 | -                          | -                 | -                           | -                 |
| ≥ 50 years                                                  | -2.1 (-4.8 to 0.5)         | 0.113             | <b>5.5 (0.8 to 10.2)</b>   | <b>0.022</b>      | -0.8 (-3.7 to 2.0)          | 0.559             |
| Sex                                                         |                            |                   |                            |                   |                             |                   |
| Male                                                        | -                          | -                 | -                          | -                 | -                           | -                 |
| Female                                                      | 0.7 (-1.6 to 3.1)          | 0.551             | -0.7 (-5.5 to 4.1)         | 0.771             | 0.4 (-1.7 to 2.5)           | 0.707             |
| Duration from baseline to endline                           |                            |                   |                            |                   |                             |                   |
| < 12 months                                                 | -                          | -                 | -                          | -                 | -                           | -                 |
| ≥ 12 months                                                 | 1.1 (-2.2 to 4.4)          | 0.515             | -1.2 (-7.3 to 4.9)         | 0.695             | -1.2 (-3.5 to 1.1)          | 0.313             |
| Comorbid                                                    |                            |                   |                            |                   |                             |                   |
| No (hypertension only)                                      | -                          | -                 | -                          | -                 | -                           | -                 |
| Yes (hypertension and diabetes)                             | -0.07 (-2.6 to 2.4)        | 0.957             | -2.3 (-7.9 to 3.3)         | 0.413             | <b>5.5 (1.1 to 9.9)</b>     | <b>0.014</b>      |
| <b>Adjusted model (+ adjusting for baseline SBP target)</b> |                            |                   |                            |                   |                             |                   |
| HealthRise-endline interaction                              | -5.6 (-11.7 to 0.5)        | 0.070             | -10.7 (-21.8 to 0.3)       | 0.058             | <b>-6.9 (-12.9 to -0.9)</b> | <b>0.024</b>      |
| Baseline SBP meets clinical target                          |                            |                   |                            |                   |                             |                   |
| Yes (< 140 mmHg)                                            | -                          | -                 | -                          | -                 | -                           | -                 |
| No (≥ 140 mmHg)                                             | <b>15.8 (12.2 to 19.3)</b> | <b>&lt; 0.001</b> | <b>24.3 (18.2 to 30.3)</b> | <b>&lt; 0.001</b> | <b>20.1 (16.4 to 23.8)</b>  | <b>&lt; 0.001</b> |
| Age                                                         |                            |                   |                            |                   |                             |                   |
| < 50 years                                                  | -                          | -                 | -                          | -                 | -                           | -                 |
| ≥ 50 years                                                  | 0.4 (-3.6 to 4.4)          | 0.834             | <b>5.8 (0.04 to 11.6)</b>  | <b>0.048</b>      | 3.2 (-0.6 to 6.8)           | 0.096             |
| Sex                                                         |                            |                   |                            |                   |                             |                   |
| Male                                                        | -                          | -                 | -                          | -                 | -                           | -                 |
| Female                                                      | 0.5 (-3.2 to 4.2)          | 0.787             | -0.8 (-6.4 to 4.8)         | 0.773             | 0.2 (-2.9 to 3.2)           | 0.918             |
| Duration from baseline to endline                           |                            |                   |                            |                   |                             |                   |
| < 12 months                                                 | -                          | -                 | -                          | -                 | -                           | -                 |
| ≥ 12 months                                                 | 0.2 (-5.1 to 5.5)          | 0.942             | -2.3 (-10.2 to 5.6)        | 0.567             | -3.4 (-7.0 to 0.2)          | 0.068             |
| Comorbid                                                    |                            |                   |                            |                   |                             |                   |
| No (hypertension only)                                      | -                          | -                 | -                          | -                 | -                           | -                 |
| Yes (hypertension and diabetes)                             | -0.6 (-4.4 to 3.2)         | 0.760             | -3.9 (-11.0 to 3.2)        | 0.273             | <b>7.3 (1.7 to 12.9)</b>    | <b>0.011</b>      |

B) Diabetes

|                                                             | Hennepin County             |                   | Ramsey County              |                   | Rice County              |                   |
|-------------------------------------------------------------|-----------------------------|-------------------|----------------------------|-------------------|--------------------------|-------------------|
|                                                             | Coefficient (95% CI)        | p-value           | Coefficient (95% CI)       | p-value           | Coefficient (95% CI)     | p-value           |
| <b>Change in A1c (%)</b>                                    |                             |                   |                            |                   |                          |                   |
| <b>Unadjusted model</b>                                     |                             |                   |                            |                   |                          |                   |
| HealthRise-endline interaction                              | -0.4 (-1.5 to 0.8)          | 0.551             | <b>-1.3 (-2.2 to -0.4)</b> | <b>0.007</b>      | -0.03 (-0.5 to 0.4)      | 0.904             |
| <b>Unadjusted model + adjusting for baseline A1c (%)</b>    |                             |                   |                            |                   |                          |                   |
| HealthRise-endline interaction                              | -0.3 (-1.5 to 0.8)          | 0.552             | <b>-1.3 (-2.3 to -0.4)</b> | <b>0.007</b>      | -0.03 (-0.5 to 0.4)      | 0.904             |
| Baseline A1c (%)                                            | <b>0.7 (0.5 to 0.9)</b>     | <b>&lt; 0.001</b> | <b>0.7 (0.6 to 0.8)</b>    | <b>&lt; 0.001</b> | <b>0.8 (0.7 to 0.8)</b>  | <b>&lt; 0.001</b> |
| <b>Unadjusted model + adjusting for baseline A1c target</b> |                             |                   |                            |                   |                          |                   |
| HealthRise-endline interaction                              | -0.3 (-1.5 to 0.8)          | 0.552             | <b>-1.3 (-2.3 to -0.4)</b> | <b>0.007</b>      | -0.03 (-0.5 to 0.4)      | 0.904             |
| Baseline A1c meets clinical target                          |                             |                   |                            |                   |                          |                   |
| Yes (< 8.0%)                                                | -                           | -                 | -                          | -                 | -                        | -                 |
| No (≥ 8.0%)                                                 | <b>2.3 (1.4 to 3.2)</b>     | <b>&lt; 0.001</b> | <b>3.0 (2.3 to 3.8)</b>    | <b>&lt; 0.001</b> | <b>3.0 (2.7 to 3.2)</b>  | <b>&lt; 0.001</b> |
| <b>Adjusted model</b>                                       |                             |                   |                            |                   |                          |                   |
| HealthRise-endline interaction                              | -0.4 (-1.5 to 0.8)          | 0.556             | <b>-1.3 (-2.3 to -0.4)</b> | <b>0.007</b>      | -0.03 (-0.5 to 0.4)      | 0.905             |
| Age                                                         |                             |                   |                            |                   |                          |                   |
| < 50 years                                                  | -                           | -                 | -                          | -                 | -                        | -                 |
| ≥ 50 years                                                  | <b>-1.8 (-3.0 to -0.6)</b>  | <b>0.006</b>      | 0.1 (-0.8 to 1.0)          | 0.828             | -0.1 (-0.6 to 0.4)       | 0.369             |
| Sex                                                         |                             |                   |                            |                   |                          |                   |
| Male                                                        | -                           | -                 | -                          | -                 | -                        | -                 |
| Female                                                      | 0.1 (-0.7 to 0.9)           | 0.833             | -0.1 (-0.9 to 0.7)         | 0.791             | -0.1 (-0.5 to 0.3)       | 0.622             |
| Duration from baseline to endline                           |                             |                   |                            |                   |                          |                   |
| < 12 months                                                 | -                           | -                 | -                          | -                 | -                        | -                 |
| ≥ 12 months                                                 | <b>-1.5 (-2.8 to -0.1)</b>  | <b>0.031</b>      | 0.2 (-0.8 to 1.1)          | 0.807             | 0.2 (-0.2 to -0.6)       | 0.369             |
| Comorbid                                                    |                             |                   |                            |                   |                          |                   |
| No (diabetes only)                                          | -                           | -                 | -                          | -                 | -                        | -                 |
| Yes (hypertension and diabetes)                             | -0.5 (-1.7 to 0.7)          | 0.417             | -0.5 (-1.3 to 0.4)         | 0.260             | 0.1 (-0.3 to -0.6)       | 0.510             |
| <b>Adjusted model (+ adjusting for baseline A1c [%])</b>    |                             |                   |                            |                   |                          |                   |
| HealthRise-endline interaction                              | -0.3 (-1.5 to 0.8)          | 0.558             | <b>-1.3 (-2.3 to -0.4)</b> | <b>0.007</b>      | -0.03 (-0.5 to 0.4)      | 0.905             |
| Baseline A1c (%)                                            | <b>0.7 (0.5 to 0.8)</b>     | <b>&lt; 0.001</b> | <b>0.7 (0.6 to 0.8)</b>    | <b>&lt; 0.001</b> | <b>0.8 (0.7 to 0.8)</b>  | <b>&lt; 0.001</b> |
| Age                                                         |                             |                   |                            |                   |                          |                   |
| < 50 years                                                  | -                           | -                 | -                          | -                 | -                        | -                 |
| ≥ 50 years                                                  | -0.9 (-1.8 to 0.06)         | 0.067             | 0.01 (-0.4 to 0.4)         | 0.972             | 0.01 (-0.2 to 0.2)       | 0.955             |
| Sex                                                         |                             |                   |                            |                   |                          |                   |
| Male                                                        | -                           | -                 | -                          | -                 | -                        | -                 |
| Female                                                      | -0.05 (-0.6 to 0.5)         | 0.852             | 0.06 (-0.3 to 0.5)         | 0.749             | 0.01 (-0.2 to 0.2)       | 0.912             |
| Duration from baseline to endline                           |                             |                   |                            |                   |                          |                   |
| < 12 months                                                 | -                           | -                 | -                          | -                 | -                        | -                 |
| ≥ 12 months                                                 | -0.7 (-1.6 to 0.2)          | 0.122             | 0.4 (-0.1 to 0.9)          | 0.098             | <b>0.2 (0.02 to 0.4)</b> | <b>0.027</b>      |
| Comorbid                                                    |                             |                   |                            |                   |                          |                   |
| No (diabetes only)                                          | -                           | -                 | -                          | -                 | -                        | -                 |
| Yes (hypertension and diabetes)                             | -0.4 (-1.4 to 0.5)          | 0.372             | 0.1 (-0.3 to 0.5)          | 0.661             | 0.01 (-0.2 to 0.2)       | 0.927             |
| <b>Adjusted model (+ adjusting for baseline A1c target)</b> |                             |                   |                            |                   |                          |                   |
| HealthRise-endline interaction                              | -0.3 (-1.5 to 0.8)          | 0.558             | <b>-1.3 (-2.3 to -0.4)</b> | <b>0.007</b>      | -0.03 (-0.5 to 0.4)      | 0.905             |
| Baseline A1c meets clinical target                          |                             |                   |                            |                   |                          |                   |
| Yes (< 8.0%)                                                | -                           | -                 | -                          | -                 | -                        | -                 |
| No (≥ 8.0%)                                                 | <b>2.0 (1.2 to 2.8)</b>     | <b>&lt; 0.001</b> | <b>3.1 (2.4 to 3.9)</b>    | <b>&lt; 0.001</b> | <b>3.0 (2.7 to 3.2)</b>  | <b>&lt; 0.001</b> |
| Age                                                         |                             |                   |                            |                   |                          |                   |
| < 50 years                                                  | -                           | -                 | -                          | -                 | -                        | -                 |
| ≥ 50 years                                                  | <b>-1.5 (-2.7 to -0.3)</b>  | <b>0.015</b>      | 0.3 (-0.5 to 1.1)          | 0.444             | -0.2 (-0.5 to 0.1)       | 0.274             |
| Sex                                                         |                             |                   |                            |                   |                          |                   |
| Male                                                        | -                           | -                 | -                          | -                 | -                        | -                 |
| Female                                                      | 0.04 (-0.7 to 0.7)          | 0.909             | -0.3 (-0.9 to 0.4)         | 0.436             | -0.08 (-0.4 to 0.2)      | 0.560             |
| Duration from baseline to endline                           |                             |                   |                            |                   |                          |                   |
| < 12 months                                                 | -                           | -                 | -                          | -                 | -                        | -                 |
| ≥ 12 months                                                 | <b>-1.2 (-2.1 to -0.05)</b> | <b>0.041</b>      | 0.3 (-0.5 to 1.1)          | 0.402             | <b>0.3 (0.01 to 0.6)</b> | <b>0.039</b>      |
| Comorbid                                                    |                             |                   |                            |                   |                          |                   |
| No (diabetes only)                                          | -                           | -                 | -                          | -                 | -                        | -                 |
| Yes (hypertension and diabetes)                             | -0.3 (-1.4 to 0.8)          | 0.583             | -0.1 (-0.9 to 0.7)         | 0.786             | -0.01 (-0.3 to 0.3)      | 0.938             |
